# Supplementary material for: Modeling recapitulates the heterogeneous outcomes of SARS-CoV-2 infection and quantifies the differences in the innate immune and CD8 T-cell responses between patients experiencing mild and severe symptoms
Source: PLoS Pathog. 2022 Jun 27;18(6):e1010630. doi: 10.1371/journal.ppat.1010630 (PMC9269964; doi:10.1371/journal.ppat.1010630)
Supplement: S6 Table — (XLSX) [file ppat.1010630.s027.xlsx]

## Sheet: Sheet1
Parameters
Fixed effect	4.49	0.55	3.71	0.01	49.52	1.32	0.02	1.49
Random effect	0.28	0.07	0.36	0.33	2.39	1.36	1.2733	0.85
Shrinkage	0.0181	-0.0872	-0.0325	0.0225	0.0089	0.0254	0.0547	-0.319
Parameters
Fixed effect	4.49	0.61	3.85	0.01	46.21	1.85	1.49
Random effect	0.28	0.05	0.31	0.25	3.43	1.15	0.97
Shrinkage	0.0228	-0.181	-0.127	0.37	0.0767	-0.0049	-0.236
Parameters
Fixed effect	4.49	0.12	0.00028	2.98	4994.02	1.49	0.5
Random effect	0.28	0.27	2.48	0.035	12.93	0.39	14.84
Shrinkage	-0.0136	-0.28	0.0211	-0.0507	-0.039	0.112	-0.222
Parameters
Fixed effect	4.49	0.014	14.97	0.0067	2053.83	2.64	1e-07	1.42
Random effect	0.28	1.73	1.0085	10.58	12.27	1.53	5.45	0.72
Shrinkage	-0.0596	0.297	-0.291	0.0883	0.0524	0.0484	0.0181	0.0205
Parameters
Fixed effect	4.49	0.66	2.88	0.0067	88.84	1.88	0.00071
Random effect	0.28	0.068	0.42	0.44	2.04	1.08	2.17
Shrinkage	-0.102	0.0609	0.175	0.069	-0.199	-0.162	-0.221
